# Supplementary material for: Astrocytic CREB in nucleus accumbens promotes susceptibility to chronic stress
Source: PubMed Central journal article supplement — bioRxiv. 2024 Jan 16:2024.01.15.575728. Preprint. [Version 1] doi: 10.1101/2024.01.15.575728 (PMC10827054; doi:10.1101/2024.01.15.575728), 2024-01-16
Supplement: NIHPP2024.01.15.575728v1-supplement-1.pdf [file NIHPP2024.01.15.575728v1-supplement-1.pdf]

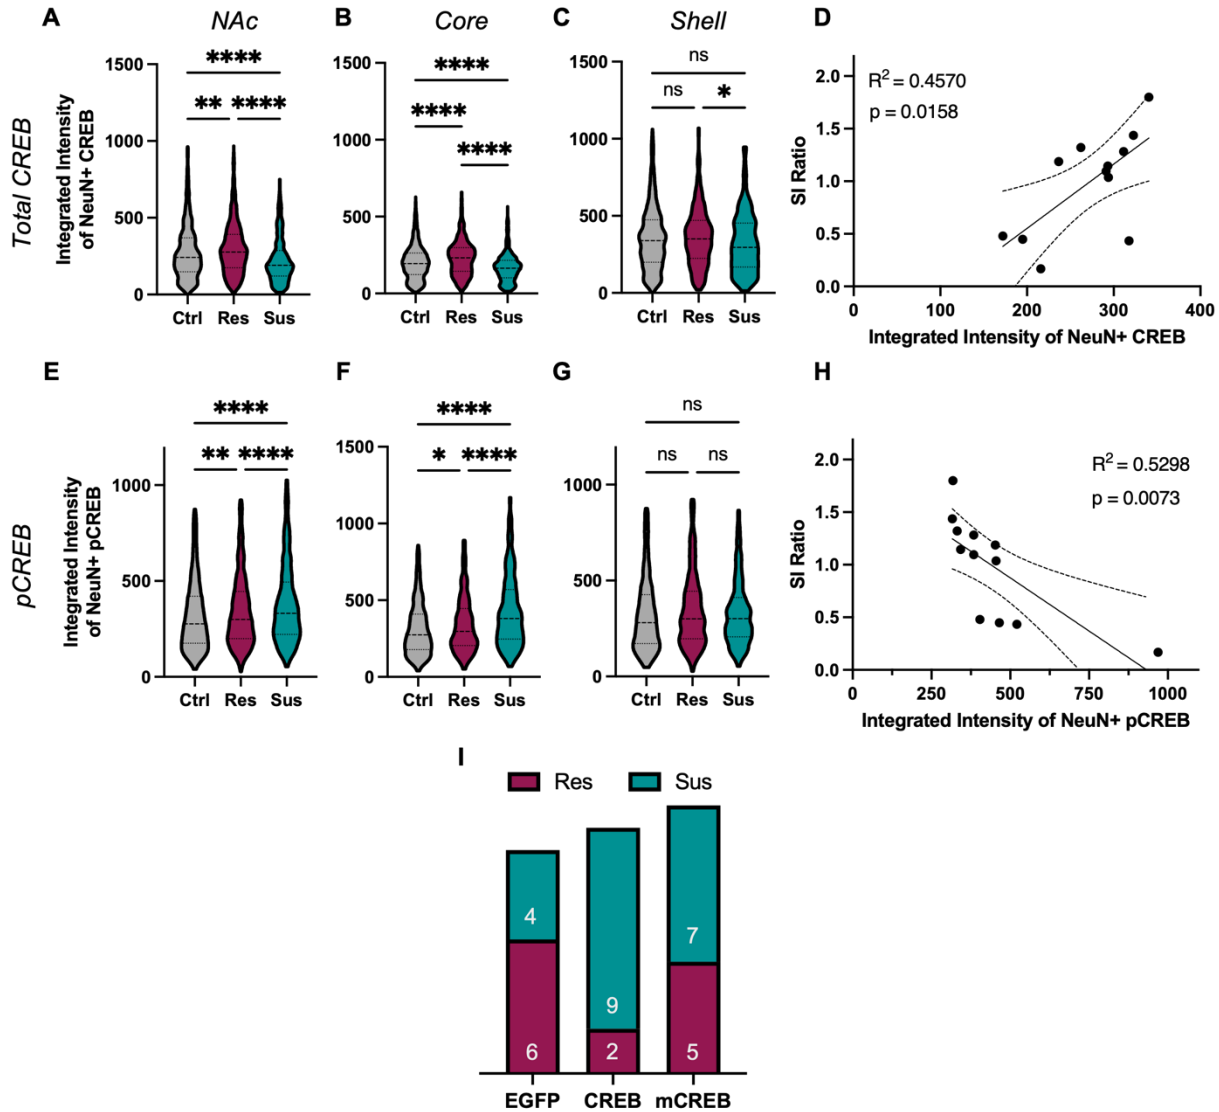

733

734 **Supplemental Figure 1.** Across the A) entire NAc, total CREB expression was decreased  
 735 in Sus neurons compared to Res and Ctrl neurons, and increased in Res neurons  
 736 compared to between Ctrl ( $F_{(2,3275)} = 50.60$ ,  $P < 0.0001$ ; Tukey post-hoc \*\* $p = 0.0016$ ;  
 737 \*\*\*\* $p < 0.0001$ ). Similar effects were observed in the B) core ( $F_{(2,1717)} = 51.68$ ,  $P < 0.0001$ ;  
 738 Tukey post-hoc \*\*\*\* $p < 0.001$ ). C) In the shell, total CREB expression was only decreased  
 739 in Sus neurons compared to Res, with no significant difference compared to Ctrl ( $F_{(2,1568)} =$   
 740  $4.271$ ,  $P = 0.0141$ ; Tukey post-hoc \* $p = 0.012$ ). D) Pearson r correlation of individual  
 741 animal's mean total neuronal CREB expression and Interaction Ratio (SI score) revealed  
 742 a strong positive correlation ( $r(12) = .676$ ,  $p = 0.0158$ ,  $R^2 = 0.4570$ ). E) In contrast,  
 743 increased expression of pCREB was observed in Sus and Res compared to Ctrl neurons  
 744 ( $F_{(2,3762)} = 36.28$ ,  $P < 0.0001$ ; Tukey post-hoc \*\* $p = 0.0013$ , \*\*\*\* $p < 0.0001$ ) in total NAc.

745 This increase in pCREB in Sus neurons was observed in F) NAc core ( $F_{(2,1951)} = 56.72$ ,  $P$   
746  $< 0.0001$ ; Tukey post-hoc \*\*\*\* $p < 0.001$ ), but not in the G) shell ( $F_{(2,1833)} = 2.782$ ,  $P =$   
747  $0.0622$ ). H) Pearson  $r$  correlation of individual animal's mean neuronal pCREB expression  
748 and Interaction Ratio (SI score) revealed a negative correlation ( $r(12) = -0.728$ ,  $p =$   
749  $0.0073$ ,  $R^2 = 0.5298$ ). I) Phenotype assignment for defeated animals following viral-  
750 mediated astrocytic CREB manipulation and CSDS. Data represented as mean  $\pm$  SEM;  
751  $n = 5$  mice per condition. pCREB: phosphorylated CREB; NAc: nucleus accumbens;  
752 CSDS: chronic social defeat stress; Res: resilient; Sus: susceptible; Ctrl: control.
